# Supplementary material
Source: PubMed Central journal article supplement (PMC5907843)
Supplement: supplementarypackagejmcb.pdf [file supplementarypackagejmcb.pdf]

## Supplementary tables and figures

**Supplementary Table 1. List of antibodies utilized in the study**

| <b>Antibody</b>                                                | <b>Company</b>            | <b>Catalogue number</b> |
|----------------------------------------------------------------|---------------------------|-------------------------|
| phosphorylated protein kinase B (Akt) (ser473)                 | Signal way Antibody       | 21054                   |
| Akt                                                            | Cell Signaling Technology | 9272                    |
| phosphorylated glycogen synthase kinase (GSK) 3 $\beta$ (Ser9) | Cell Signaling Technology | 9331                    |
| GSK3 $\beta$                                                   | Cell Signaling Technology | 9315                    |
| PAK1                                                           | Cell Signaling Technology | 2602S                   |
| Histone3                                                       | Cell Signaling Technology | 2650S                   |
| IRS1                                                           | Cell Signaling Technology | 2382L                   |
| Phospho-Tyrosine (p-Tyr)                                       | Cell Signaling Technology | 9411                    |
| GAPDH                                                          | Santa Cruz Biotechnology  | sc-25778                |
| ChREBP                                                         | Santa Cruz Biotechnology  | sc-21189                |
| ERK                                                            | Santa Cruz Biotechnology  | sc-94                   |
| p-ERK                                                          | Santa Cruz Biotechnology  | sc-7383                 |
| Oct-1                                                          | Santa Cruz Biotechnology  | sc-8024                 |
| p-PAK1(Thr423)                                                 | Santa Cruz Biotechnology  | sc-12925                |
| Normal rabbit IgG                                              | Santa Cruz Biotechnology  | sc-2027                 |
| $\beta$ -actin                                                 | Santa Cruz Biotechnology  | Sc-47778                |

**Supplementary Table 2. Nucleotide sequences of primers utilized in the study**

| Gene name                                         | Forward (5' to 3' )    | Reverse (5' to 3' )   |
|---------------------------------------------------|------------------------|-----------------------|
| <b>Human</b>                                      |                        |                       |
| <i>ChREBP<math>\alpha</math></i>                  | GGTCACTTCATGGTGTCGTC   | CACATCTGTAGGCCAGGCT   |
| <b>POU (ChREBP<math>\alpha</math>) (for ChIP)</b> | CAGGACTCCAAGGAAAGACG   | GTCTGTGTCCGAGTCCGAGT  |
| <b>Intron-I (ChREBP) (for ChIP)</b>               | AGGGCATCTAAGGTCTTGGT   | CCCCAGCTATCTCTGACTGG  |
| <i><math>\beta</math>-actin</i>                   | TCATGAAGTGTGACGTTGACA  | CCTAGAAGCATTGCGGTG    |
| <b>Mouse</b>                                      |                        |                       |
| <i>ChREBP (total)</i>                             | CCCCCAGCTTTGGCCCCATG   | TCGGTCCAGGAGCAGGTGGG  |
| <i>ChREBP<math>\alpha</math></i>                  | CGACACTCACCCACCTCTTC   | TTGTTTCAGCCGATCTTGTC  |
| <i>ChREBP<math>\beta</math></i>                   | TCTGCAGATCGCGTGGAG     | CTTGTCGCCGCATAGCAAC   |
| <i>Srebf1/SREBP-1c</i>                            | TAGAGCATATCCCCCAGGTG   | GGTACGGGCCACAAGAAGTA  |
| <i>Acaca/Acc1</i>                                 | CACTCCTTAGAGAGGGGTCA   | TAACTTCCCAGCAGACGGTG  |
| <i>Fas/Fasn</i>                                   | AGAAGTGCAGCAAGTGTCCA   | GGTCGGATGAGGGCAATCTGG |
| <i>Scd1</i>                                       | TGGAGCCACAGAACTTACAAG  | GTTTTCCGCCCTTCTCTTTG  |
| <i>Me1</i>                                        | AGGCTATTGTGGTAACTGATGG | CAGGAAGGCGTCATACTCAG  |
| <i>Lpk/Pklr</i>                                   | GAGTCGGAGGTGGAAATTGT   | CCGCACCACTAAGGAGATGA  |
| <b>POU (ChREBP<math>\alpha</math>) (for ChIP)</b> | CAGAAAGAAAGGCGAAGCAC   | GCCACTATTGTCCGCAACTC  |
| <b>Intron-I (ChREBP) (for ChIP)</b>               | AAGTTCAGGCTGGCATTGAG   | CCAACCTTGACGTAGCGTTC  |
| <b>GAPDH</b>                                      | GACCACAGTCCATGCCATCA   | TGAAGTCGCAGGAGACAACC  |

**Figure. S1**

**A**

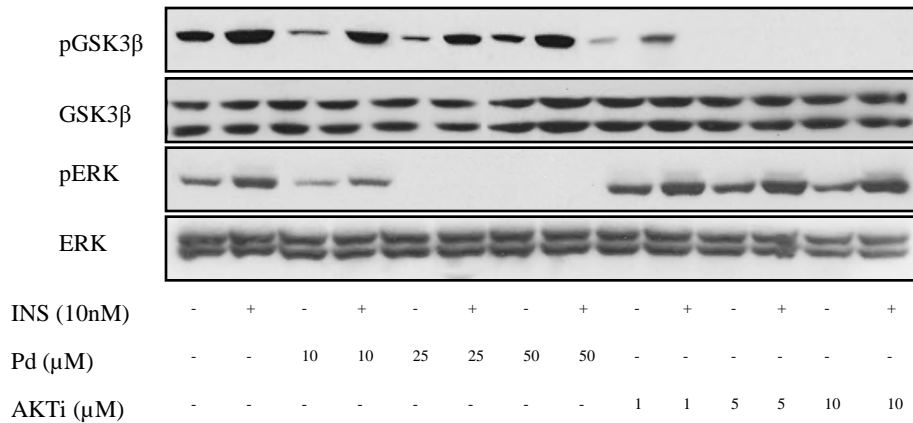

**B**

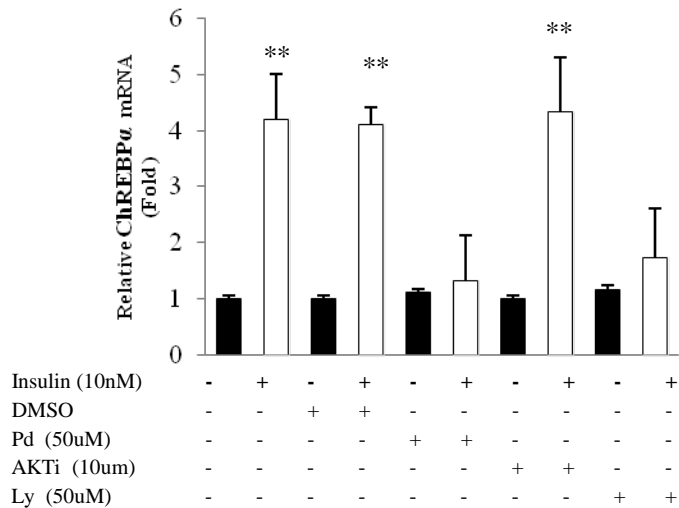

**Supplementary Figure S1.** **A)** Western blot shows the anticipated repressive effect of chemical inhibitors on the phosphorylation of GSK-3 $\beta$  (by Akti) and ERK-1 (by PD98059, Pd) in human HepG2 cell line. **B)** qRT-PCR analyses shows that insulin stimulated *ChREBP* mRNA expression can be blocked by the MEK inhibitor PD98059 but not by the Akt inhibitor Akti in HepG2 cells.

**Figure. S2**

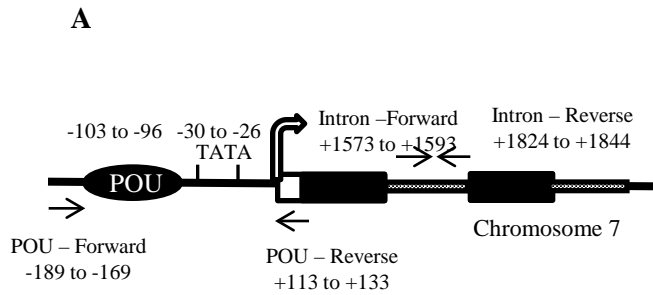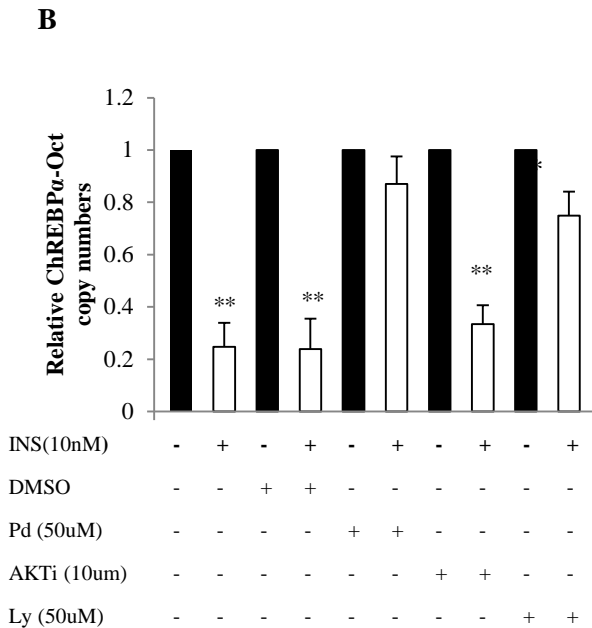

**Supplementary Figure S2. A)** Overall organization of human *ChREBP $\alpha$*  gene proximal 5' flanking region and the positions of primers utilized for qChIP. **B)** qChIP shows that insulin attenuated Oct-1 binding to ChREBP promoter in the HepG2 cell line can be blocked by MEK-ERK inhibition, but not by Akt inhibition. Values are presented as arbitrary copy number, with the untreated sample defined as 1.

**Figure. S3**

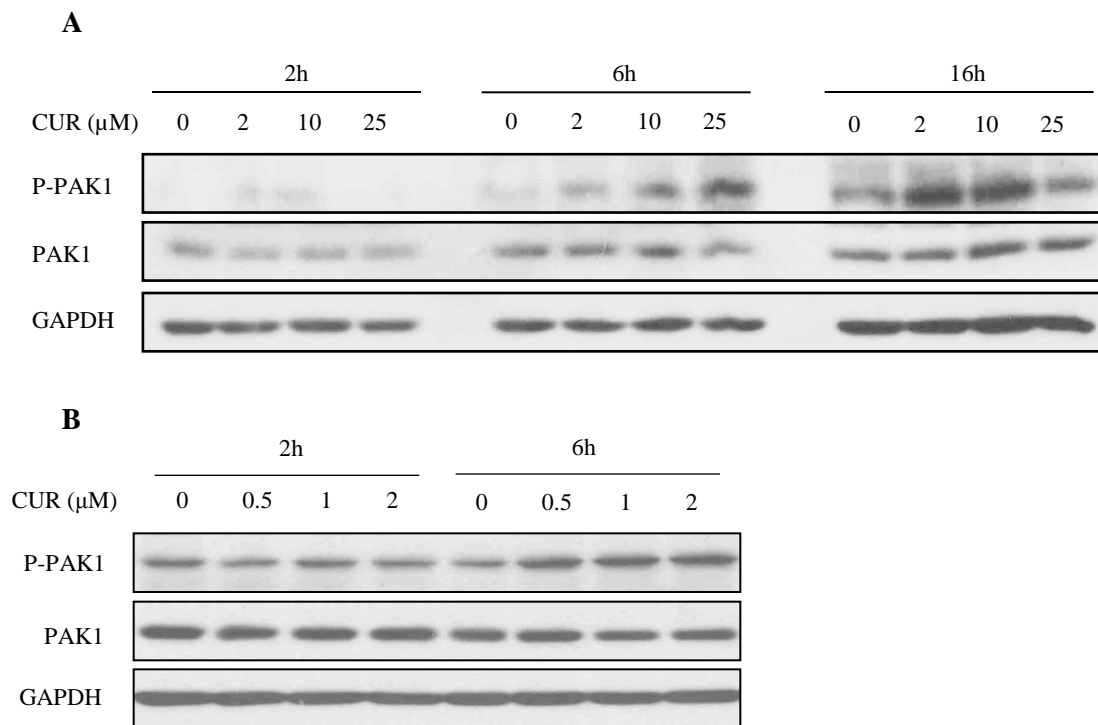

**Supplementary Figure S3.** Western blot shows the effect of curcumin treatment (with indicated dosages and time intervals) on Pak1 Thr 423 phosphorylation in the HepG2 cell line.

**Figure. S4**

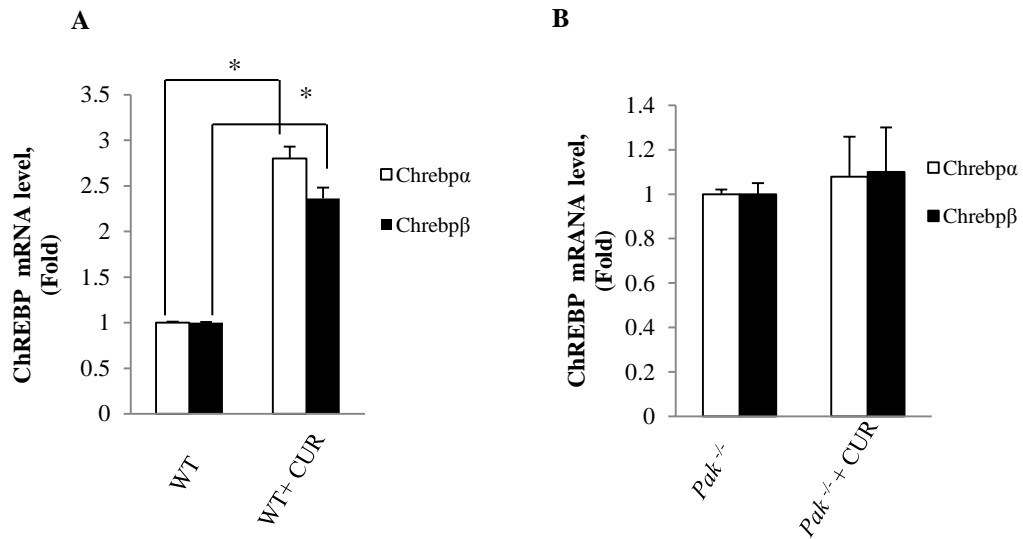

**Supplementary Figure S4.** Curcumin stimulated *ChREBP $\alpha$*  and *ChREBP $\beta$*  mRNA expression was not observed in *Pak1*<sup>-/-</sup> hepatocytes. Hepatocytes were isolated from 12 wk old control littermates (A) and *Pak1*<sup>-/-</sup> mice (B). Cells were treated with 1.0  $\mu$ M curcumin for 4 h before harvested for qRT-PCR. Values are presented as arbitrary copy number, with the untreated sample defined as 1. n = or > 3.

**Figure. S5**

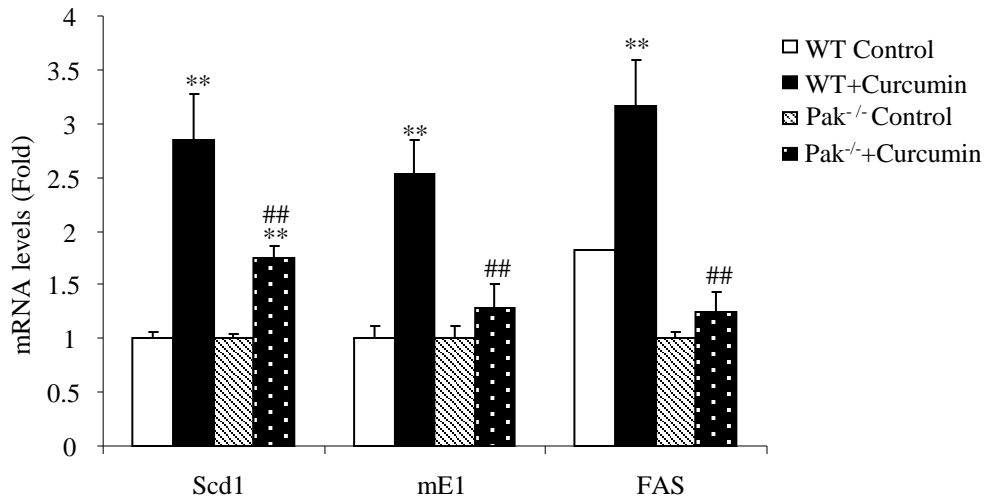

**Supplementary Figure S5.** *Pak1*<sup>-/-</sup> hepatocytes show attenuated response to curcumin treatment on the three genes that encode lipogenic enzymes. Hepatocytes were isolated from 12 wk old control littermates (WT) and *Pak1*<sup>-/-</sup> mice. Cells were treated with 1.0  $\mu$ M curcumin for 4 h before harvested for qRT-PCR analyses. Values are presented as arbitrary copy number, with the untreated sample (control vehicle) defined as 1. n = 3. \*\*, WT or *Pak1*<sup>-/-</sup> control vs. curcumin treatment. ##, WT curcumin vs. *Pak1*<sup>-/-</sup> + curcumin.
